# Supplementary material for: KAI1(CD82) is a key molecule to control angiogenesis and switch angiogenic milieu to quiescent state
Source: Springer Nature journal article supplement (doi:10.1186/s13045-021-01147-6), 2021-09-16

# Supplemental Figure 1

## A

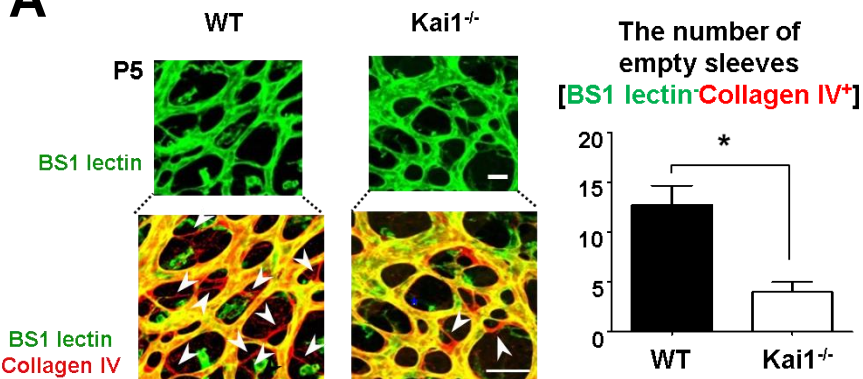

## B

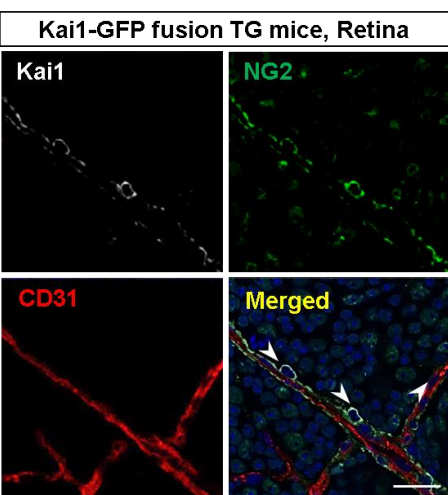

## C

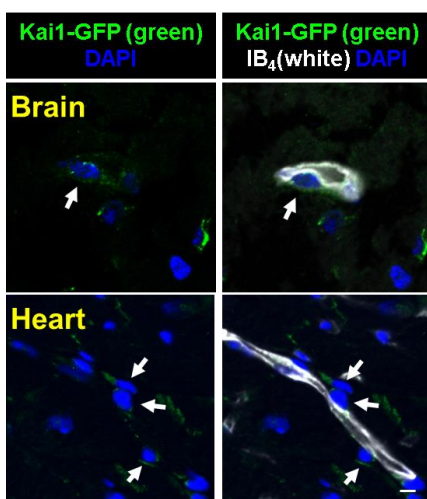

## D

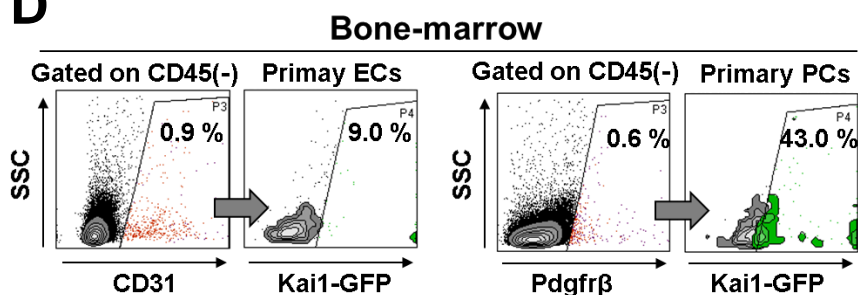

## E

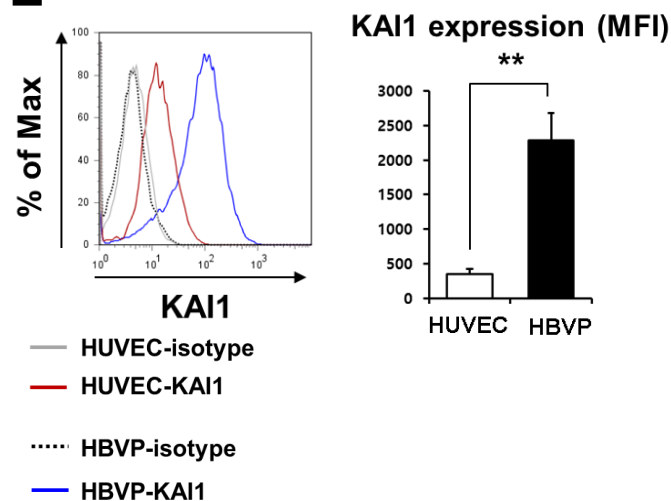

## F

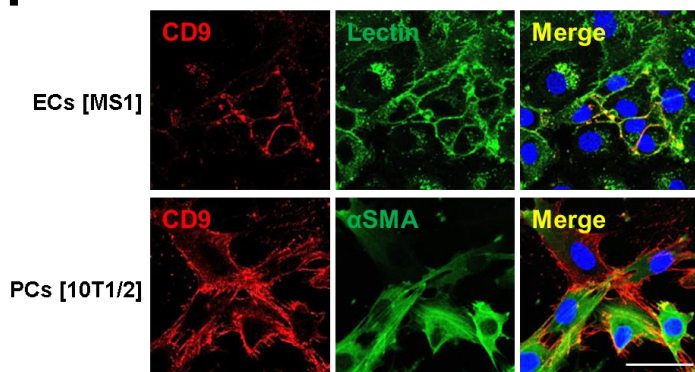

## G

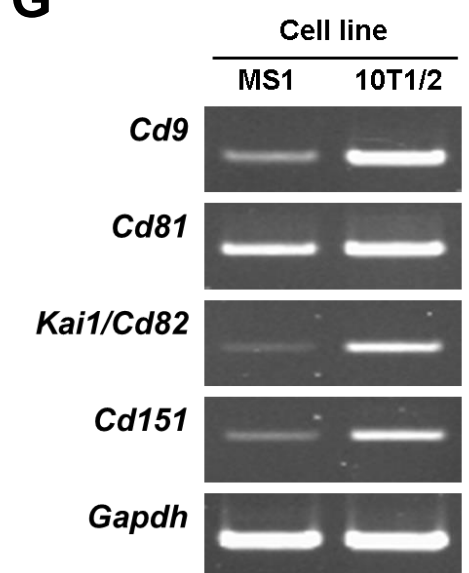

## H

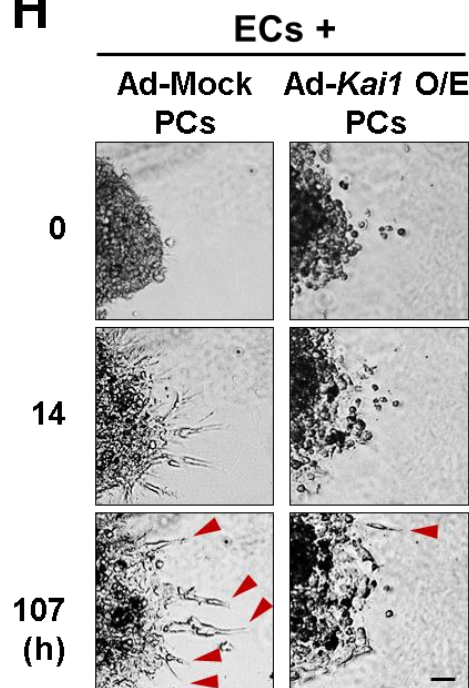

# Supplemental Figure 2

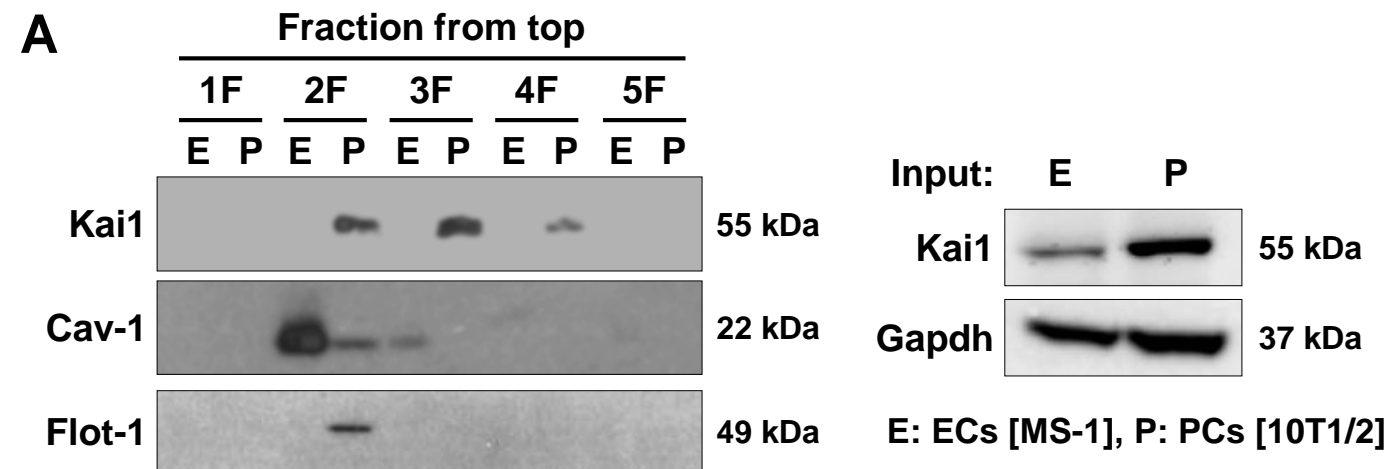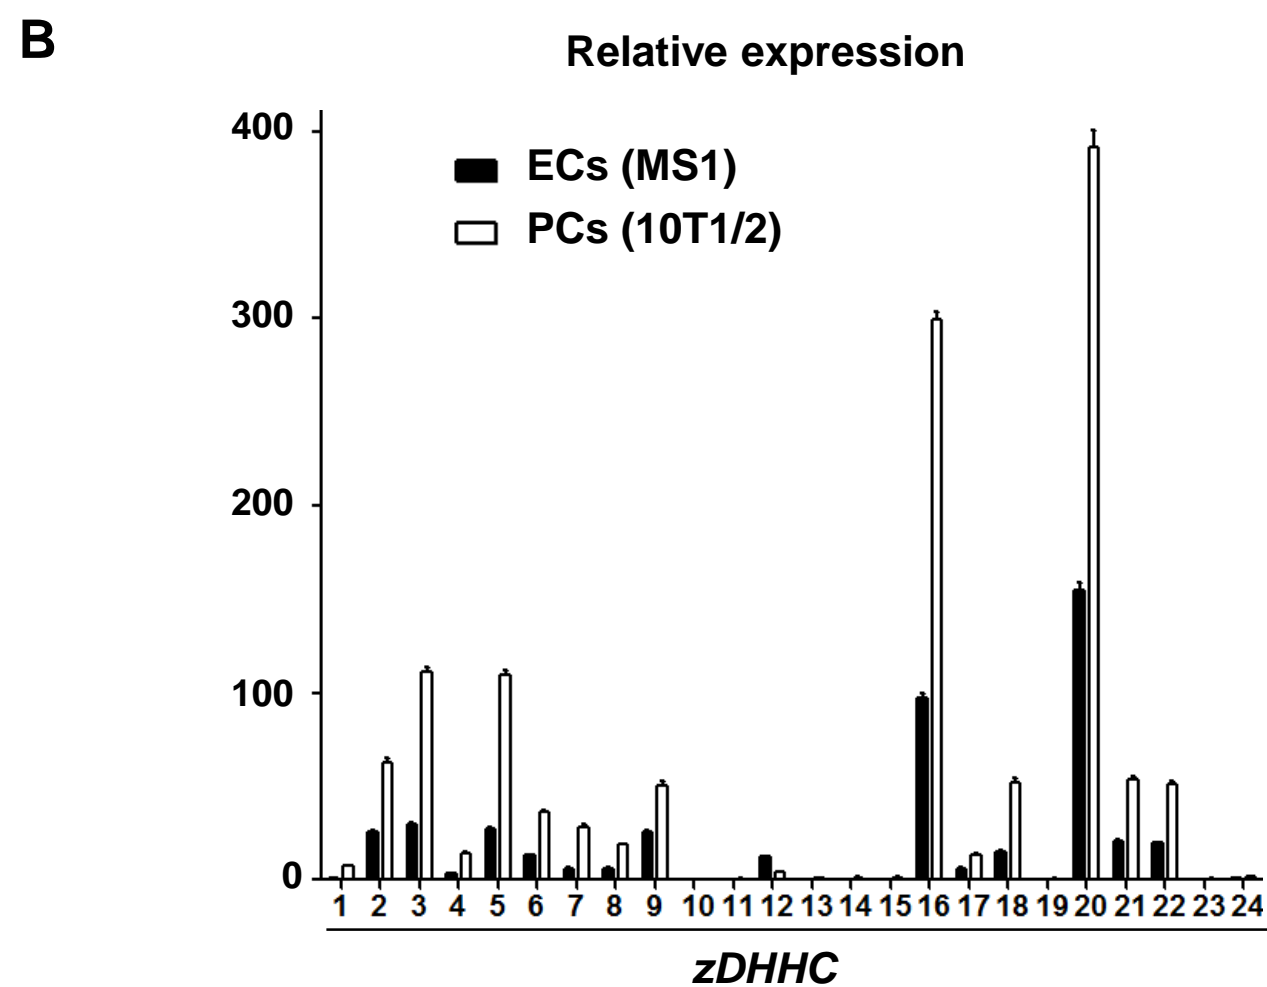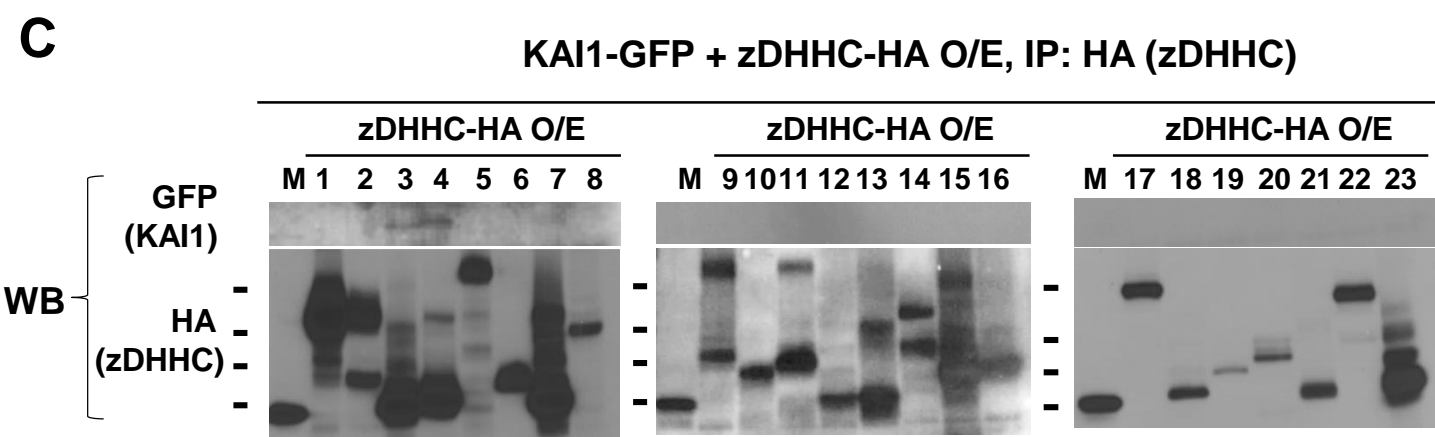

# Supplemental Figure 3

## A

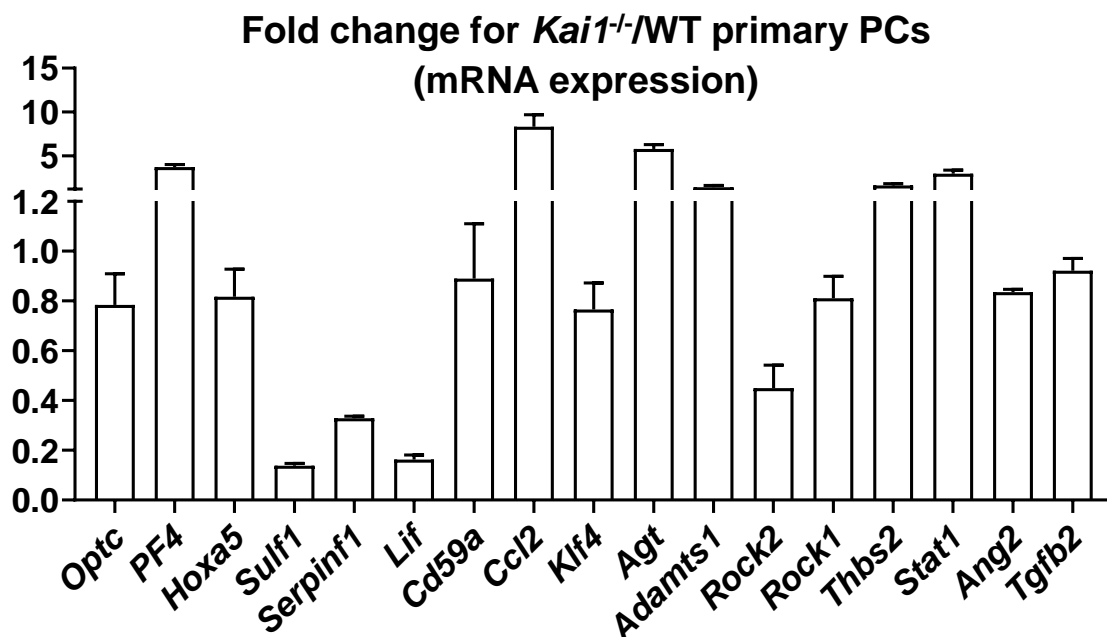

## B

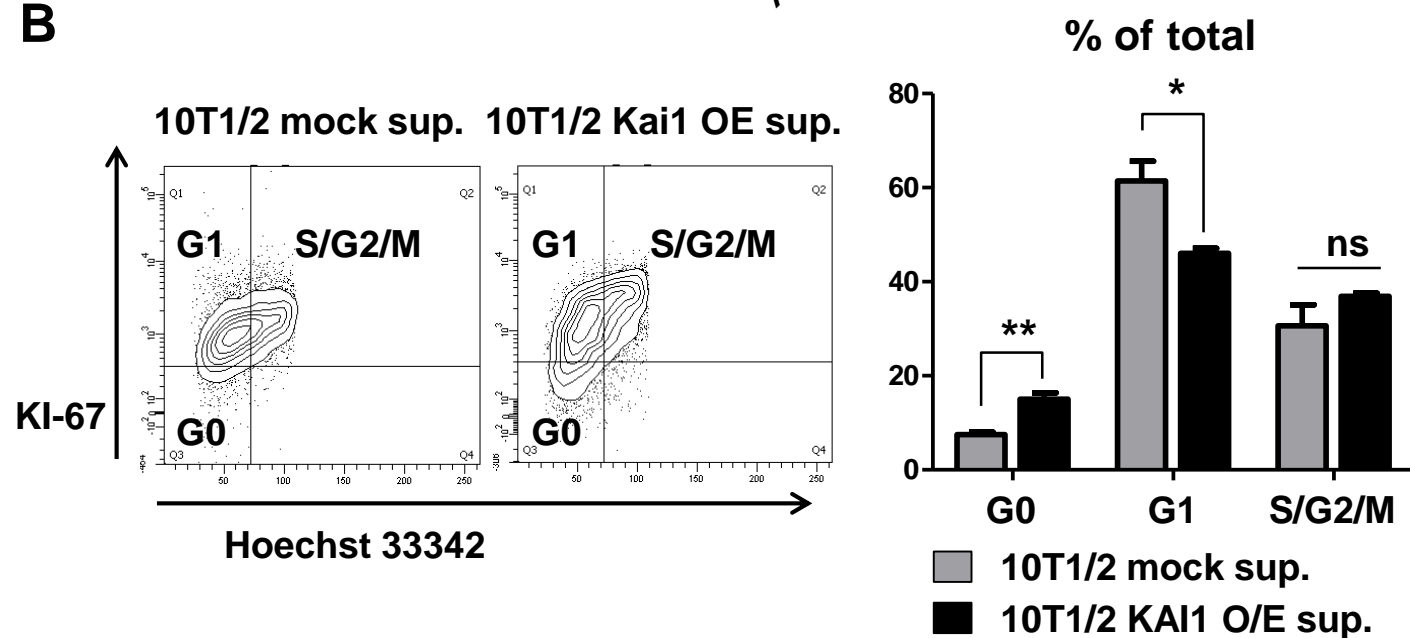

## C

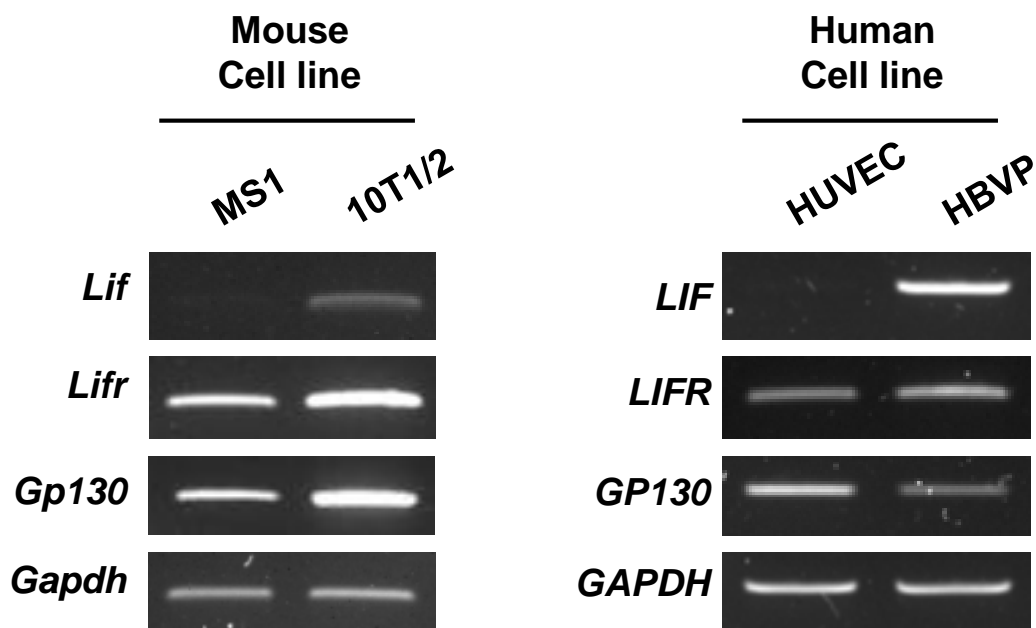

# Supplemental Figure 4

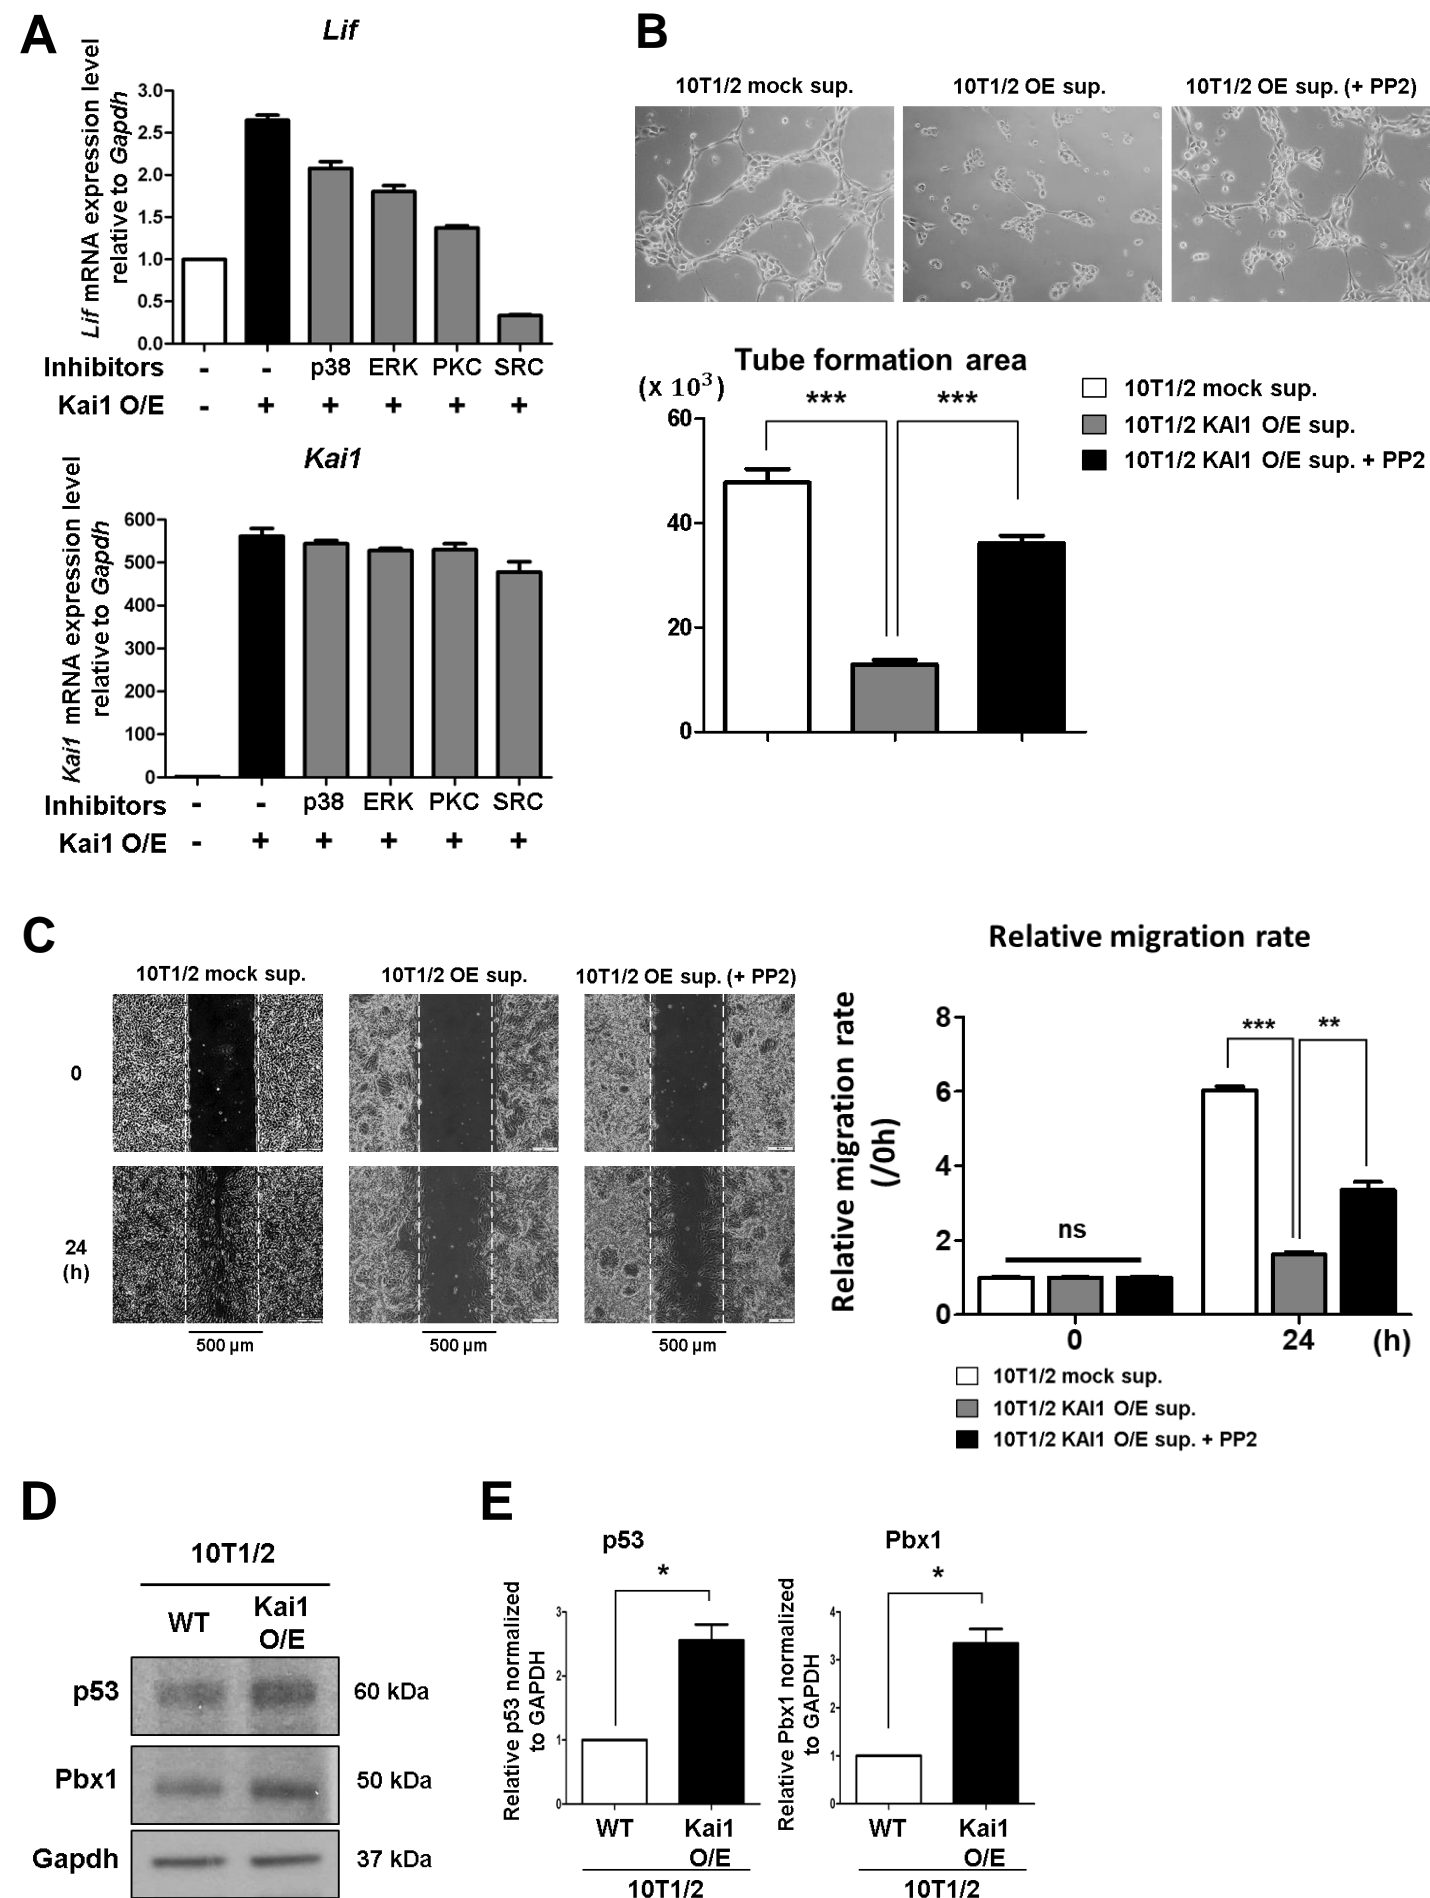

# Supplemental Figure 5

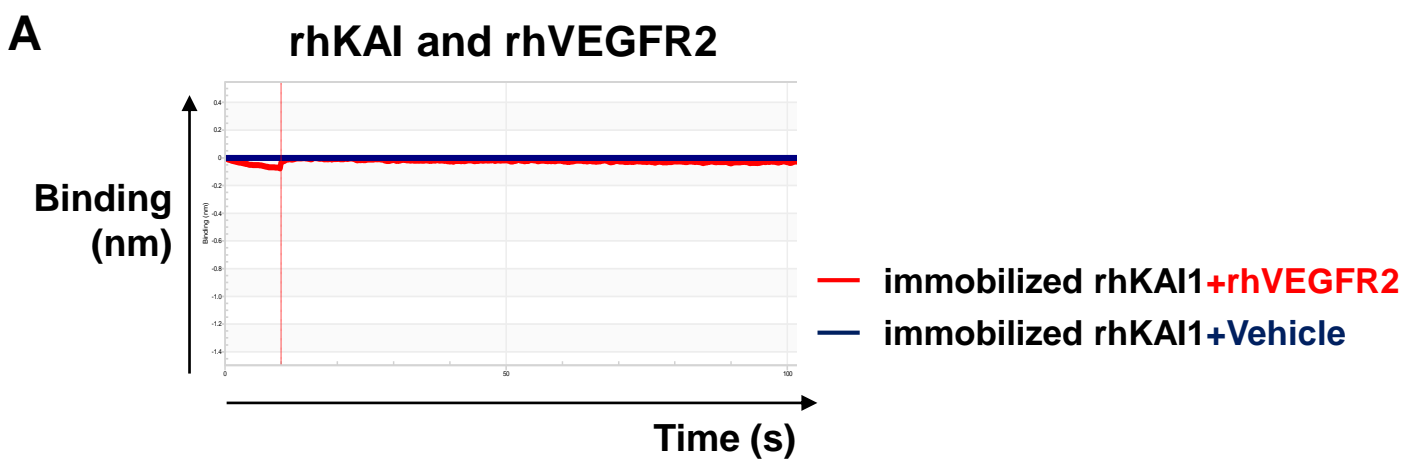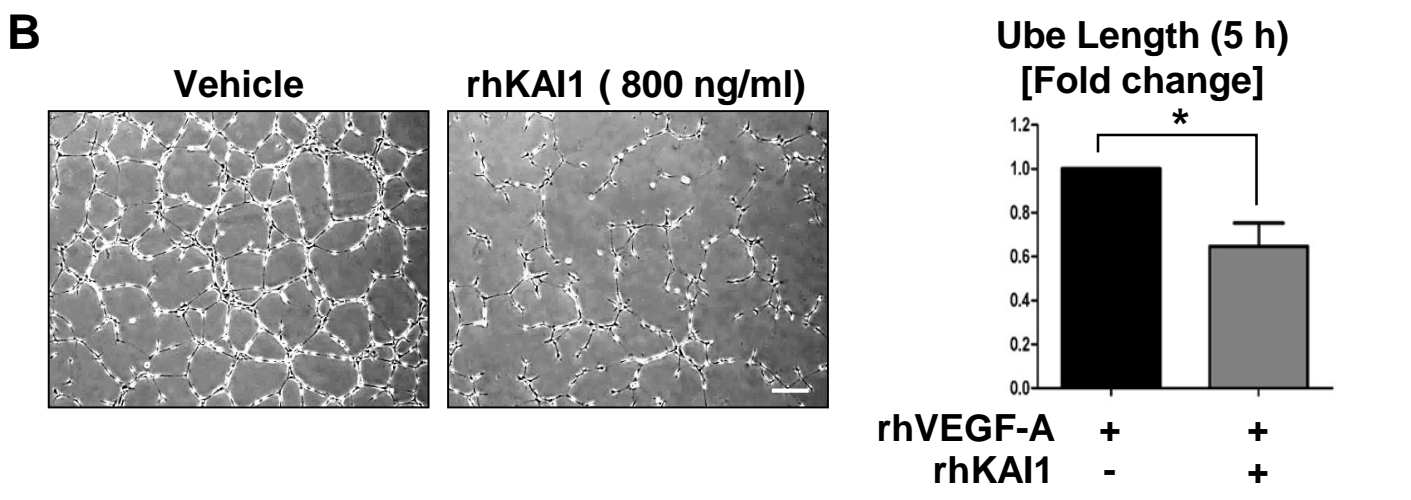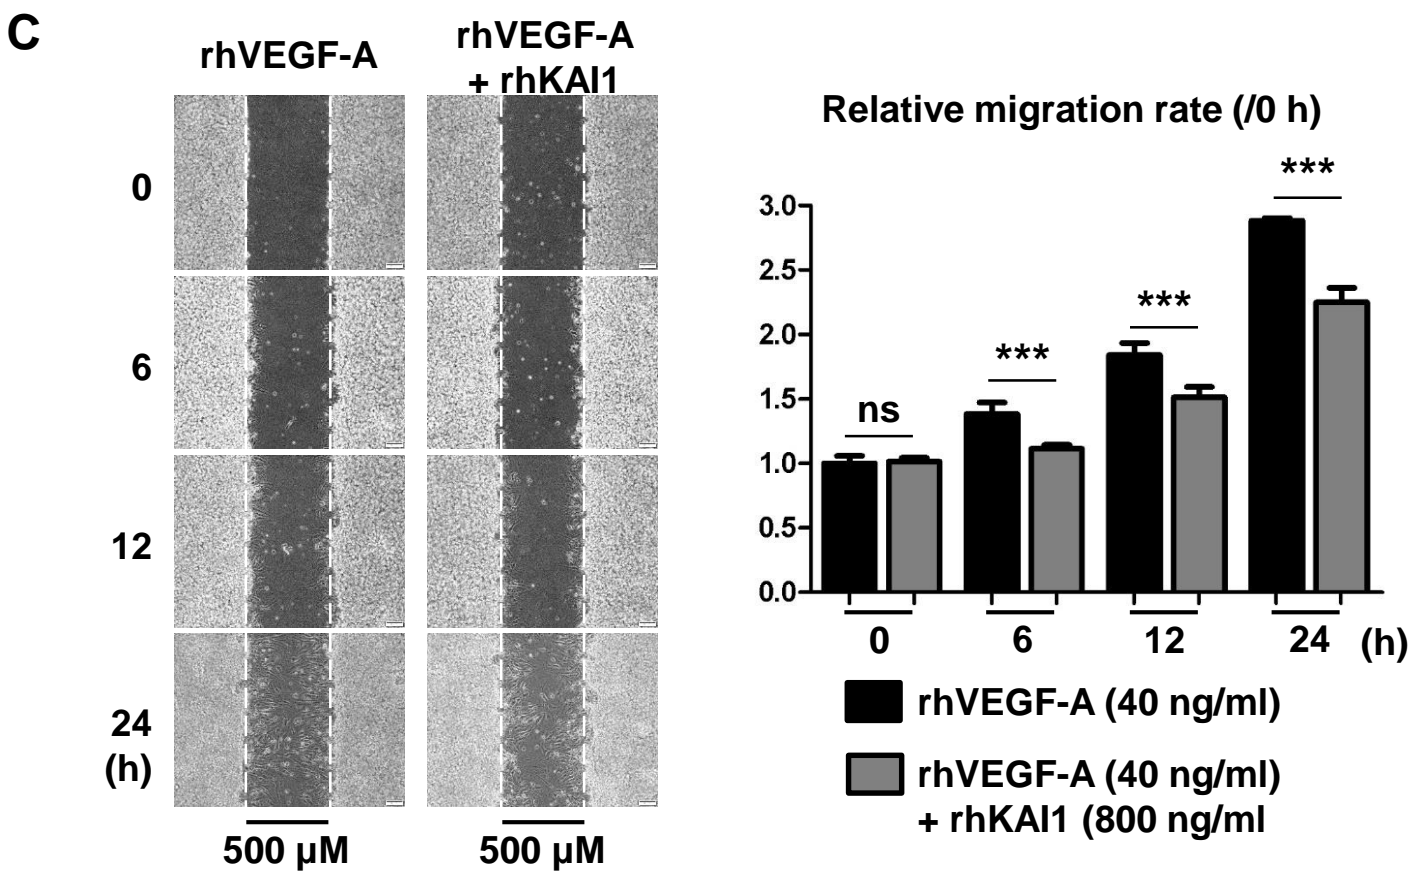

500  $\mu$ m      500  $\mu$ m

# Supplemental Figure 6

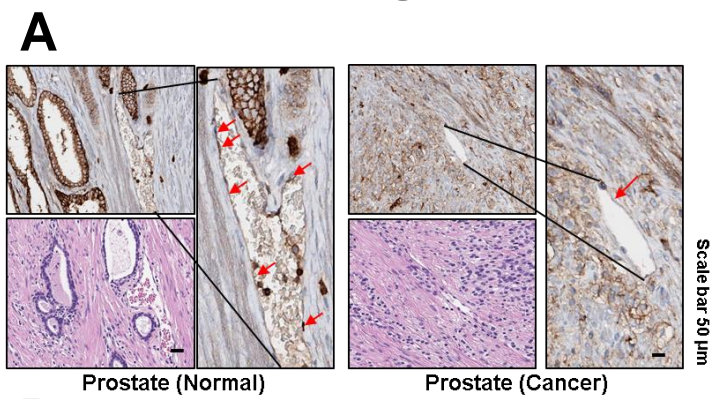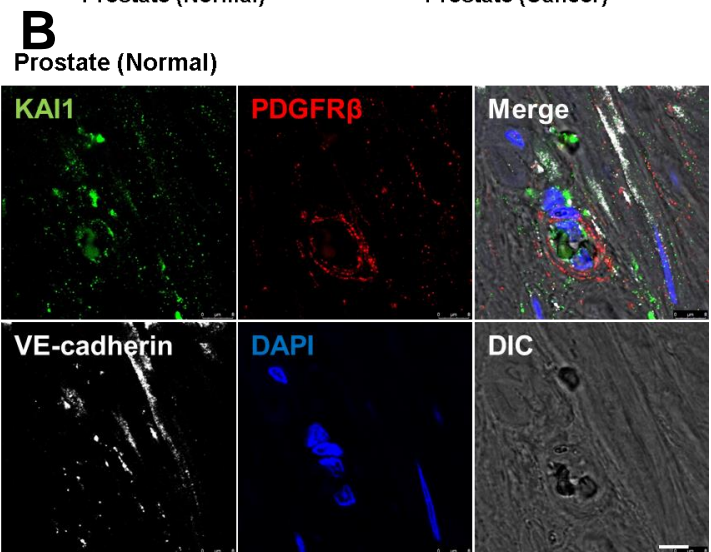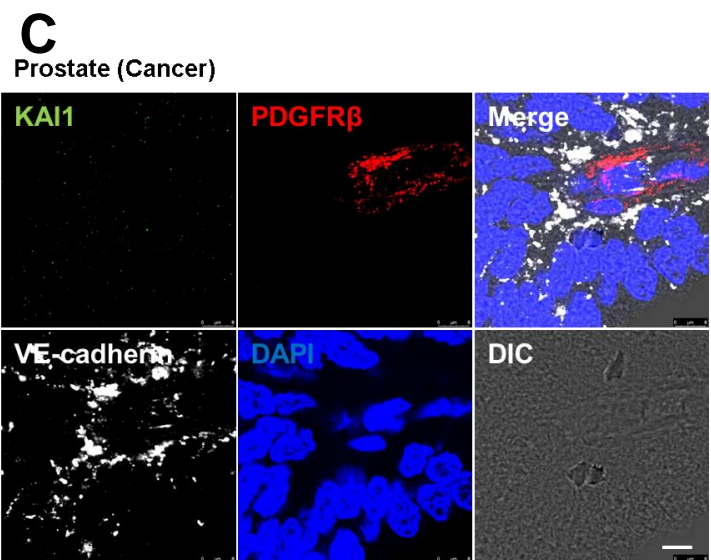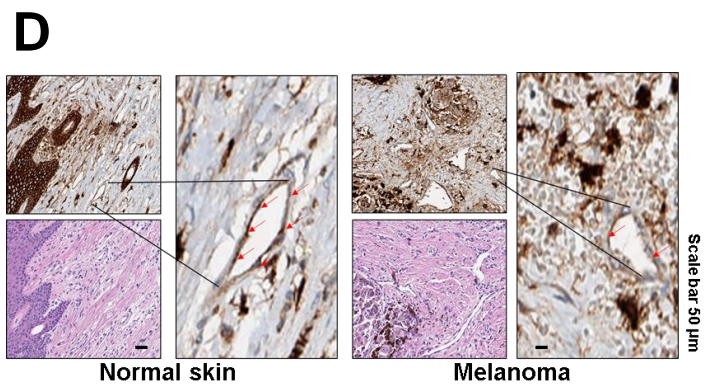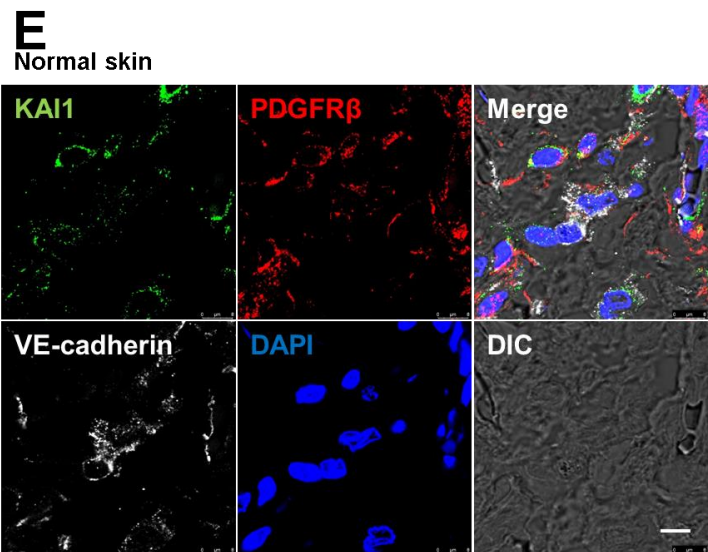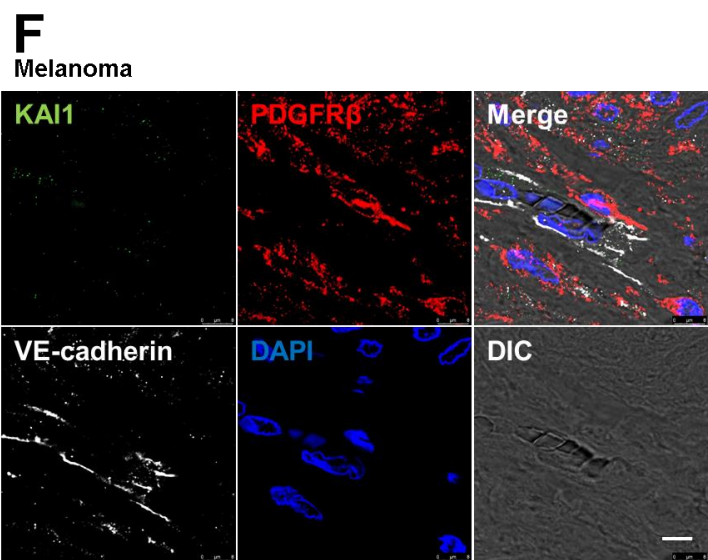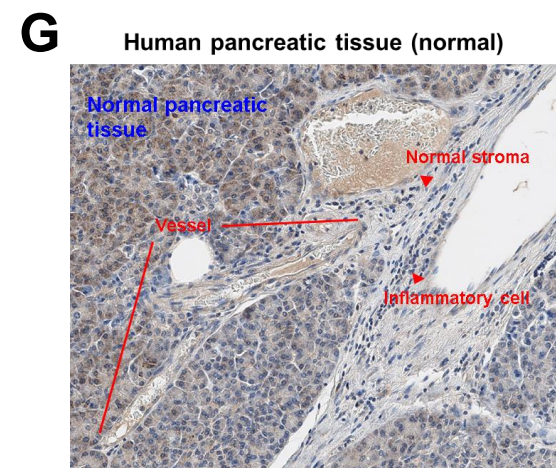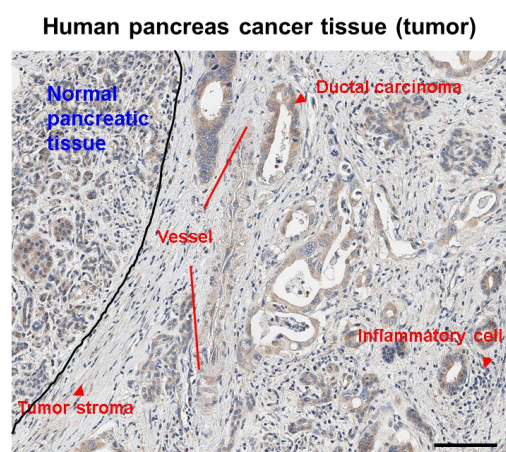

# Supplemental Figure 7

## B16 (Melanoma cells)

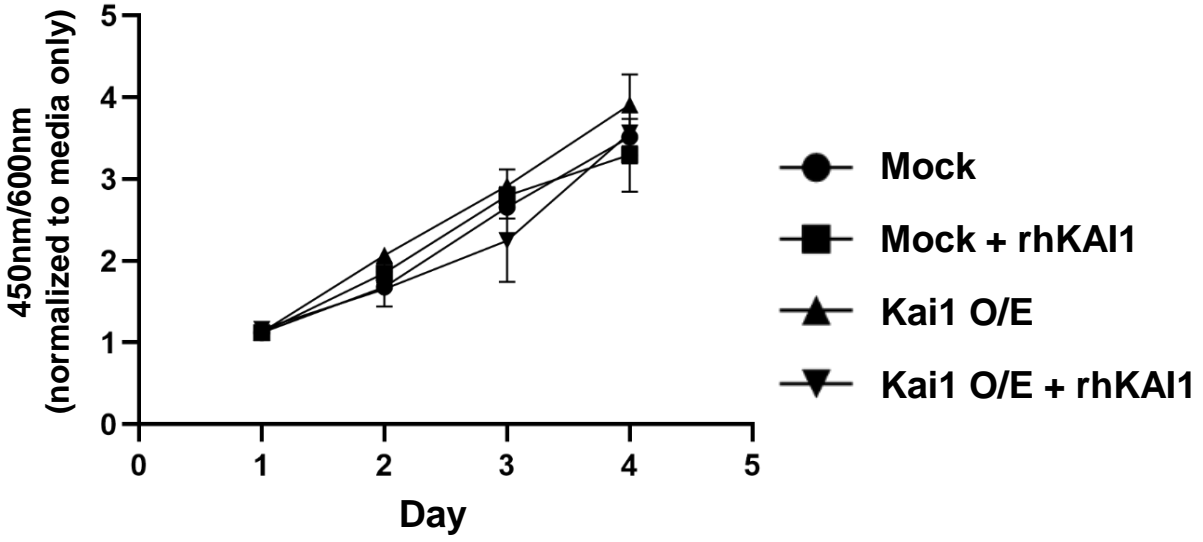

# Supplemental Figure 8

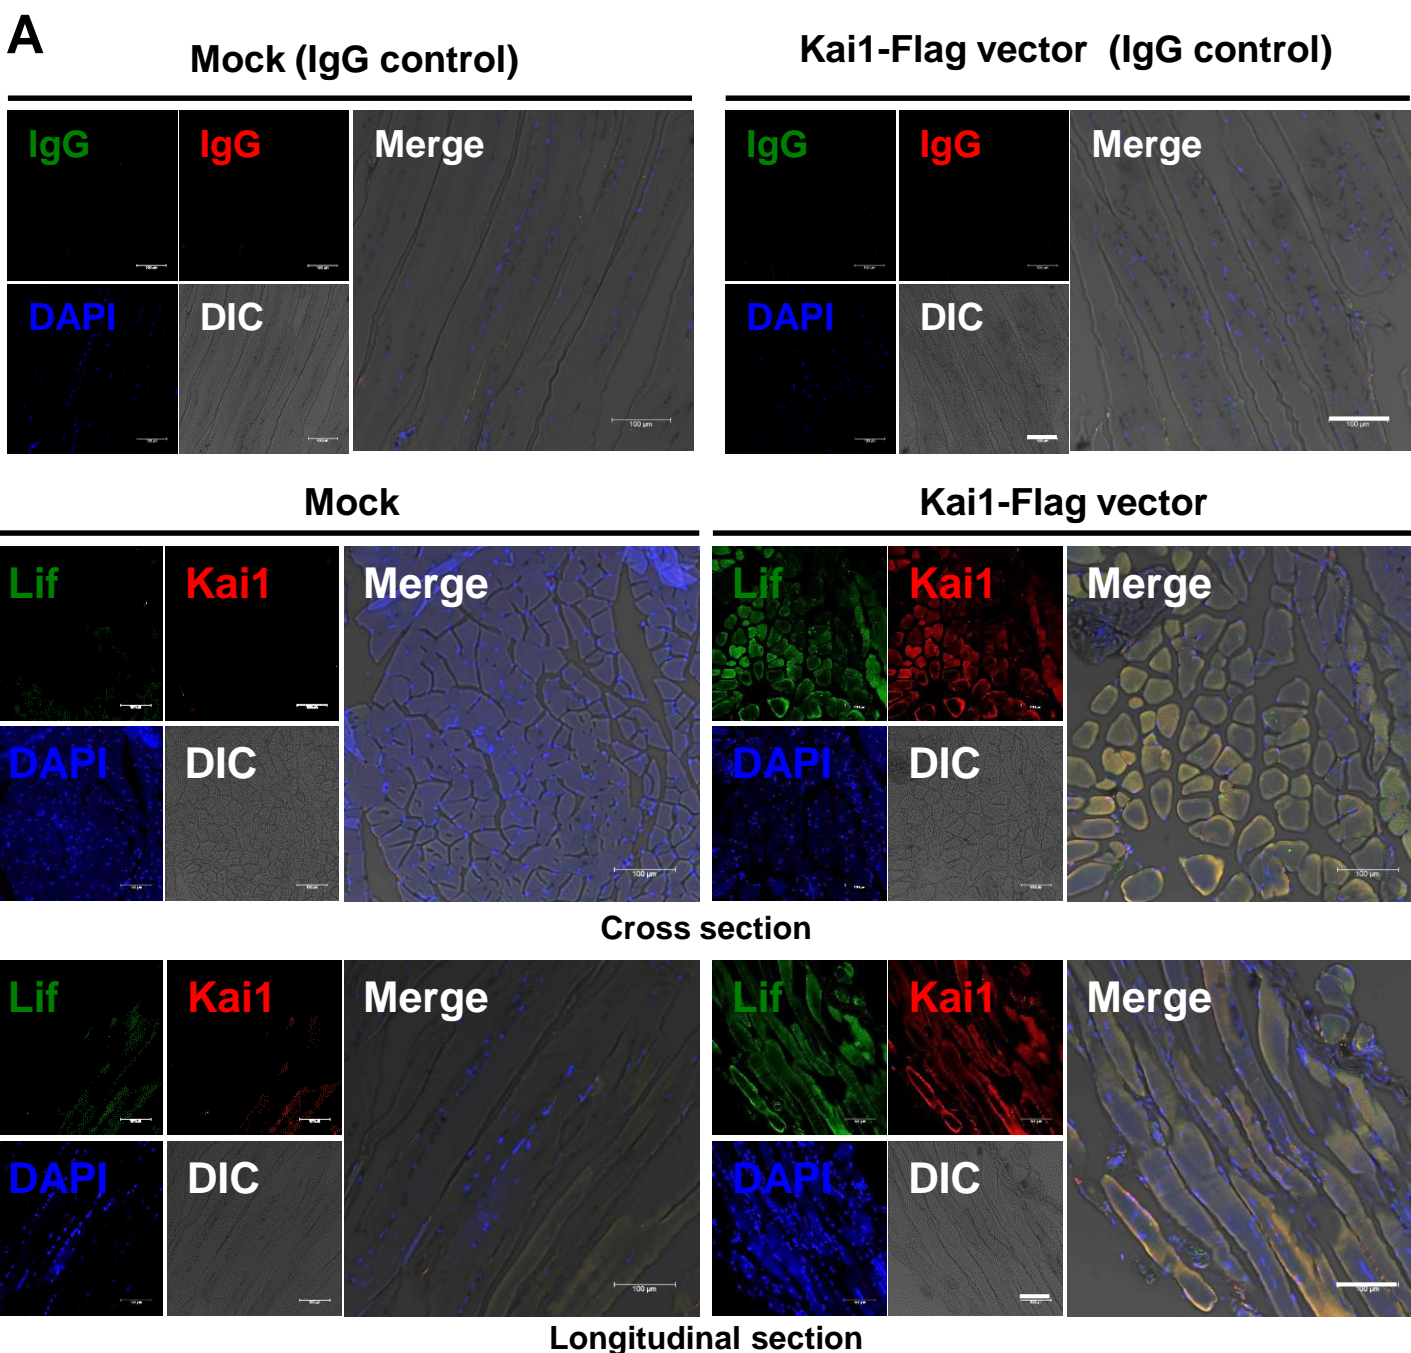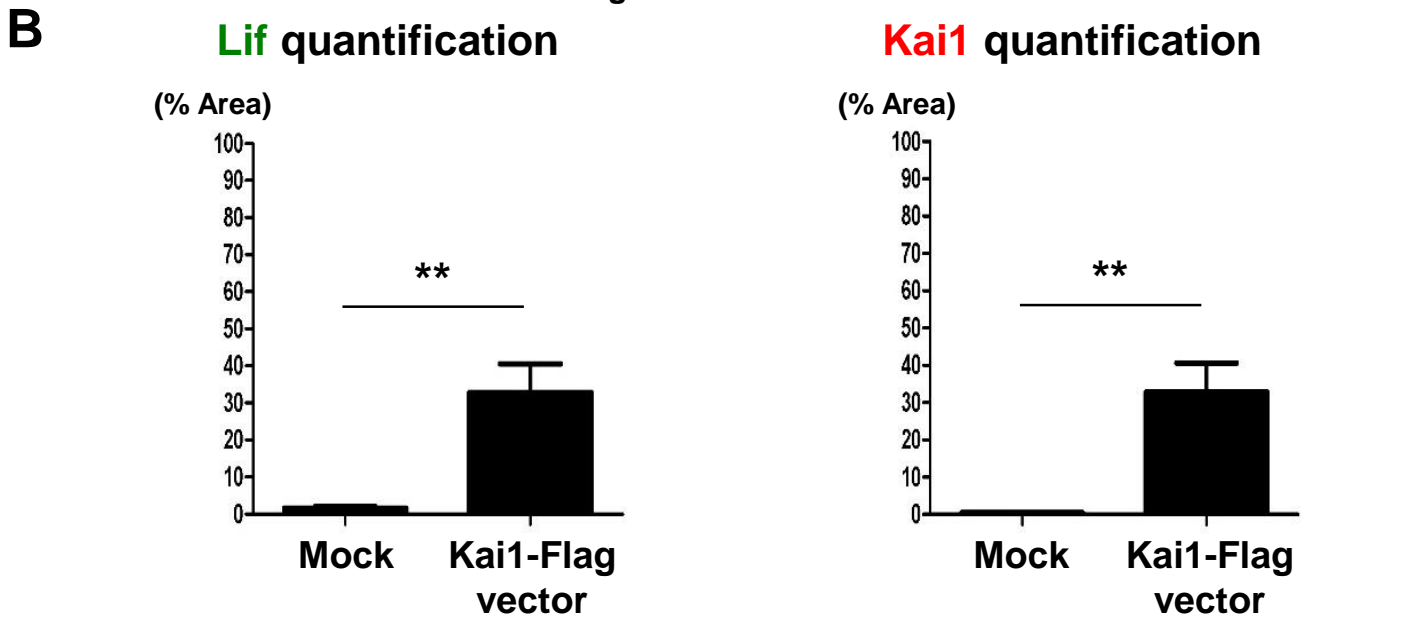



# Supplemental Figure 9

A

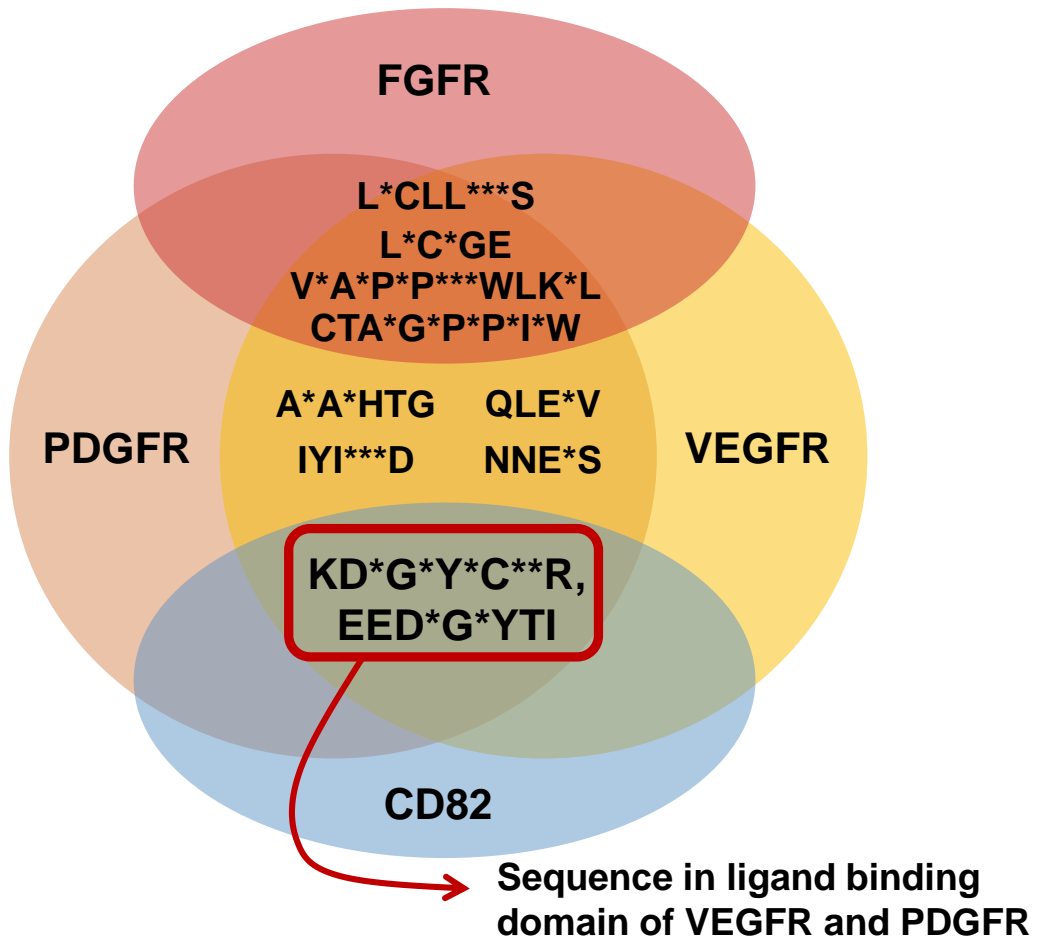

B

Consensus motif among VEGFR, PDGFR, CD82

KD\*G\*Y\*C\*\*R (Y172 C174)

EED\*G\*YTI (E181 E182 D183)

KAI1 peptide and characteristics

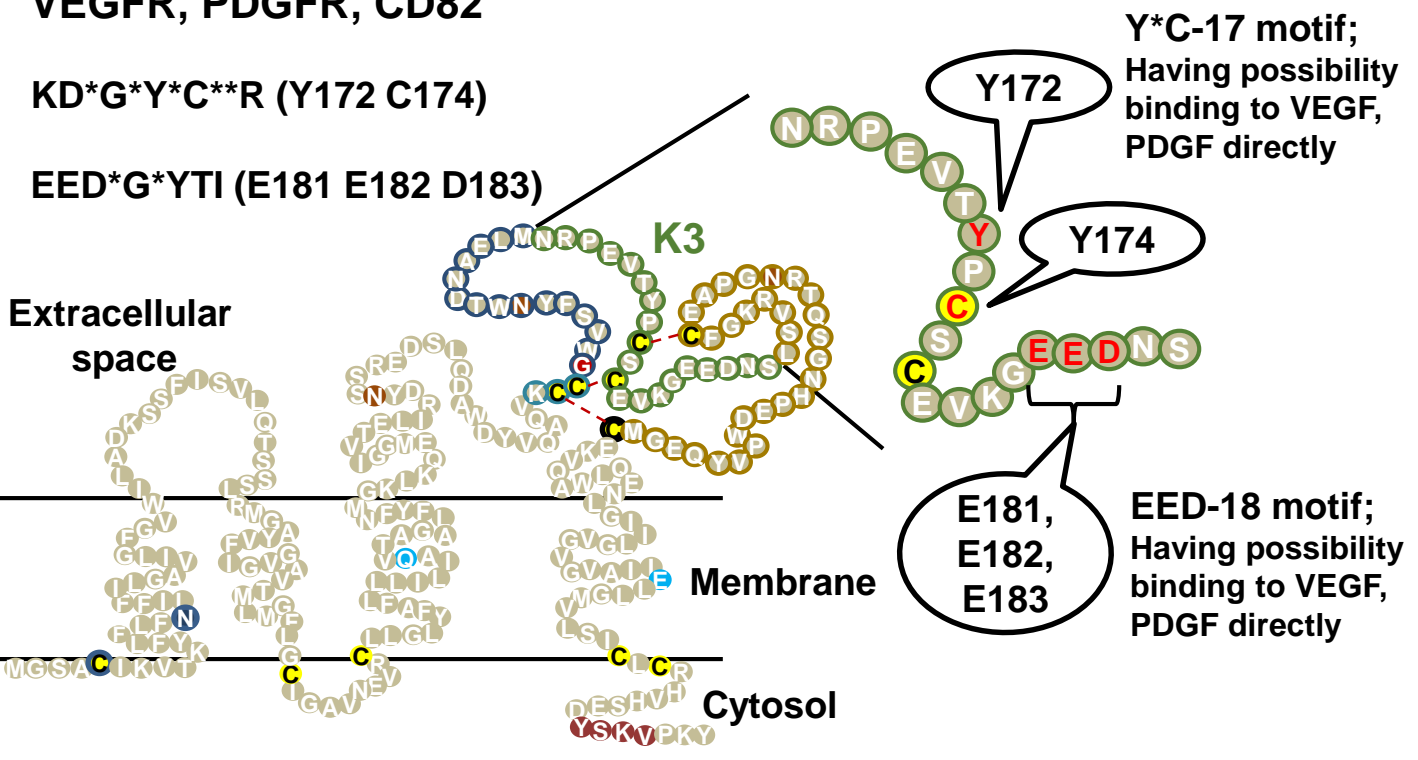

# Supplemental Figure 10

## KAI1 mutant peptide – VEGF binding test

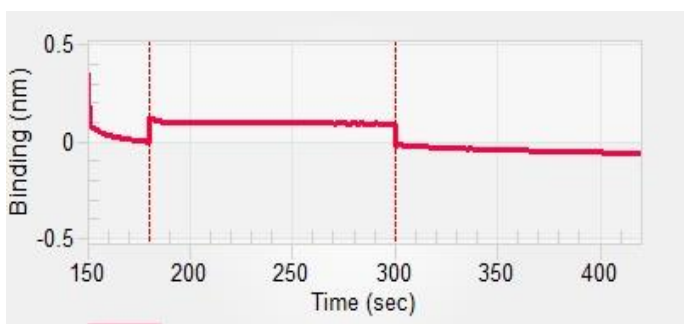

**KAI1 WT peptide – VEGF**

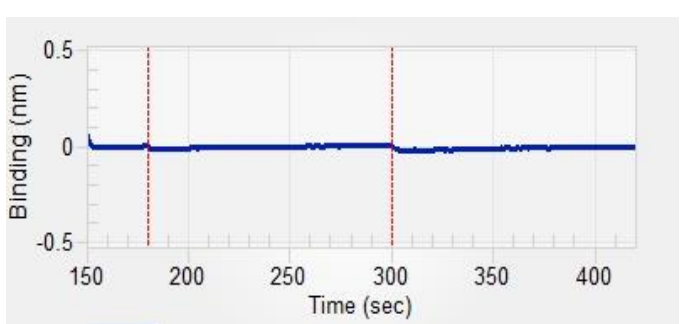

**KAI1 mutant peptide - VEGF**

## KAI1 mutant peptide – PDGF binding test

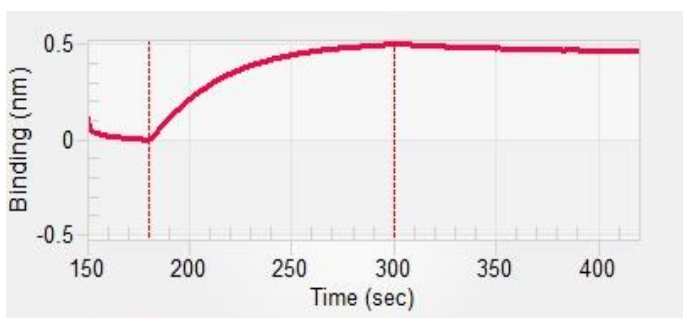

**KAI1 WT peptide – PDGF**

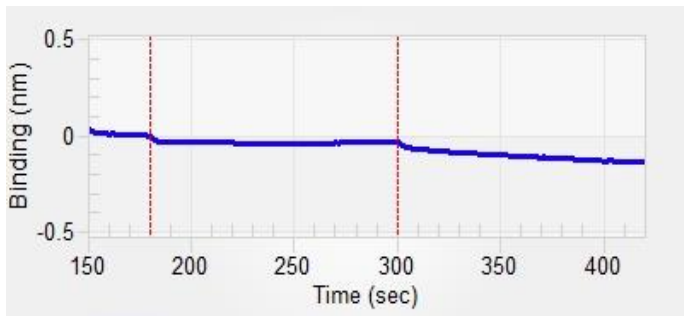

**KAI1 mutant peptide - PDGF**

# Supplemental Figure 11

**miR-181a**  
(inducing angiogenesis)

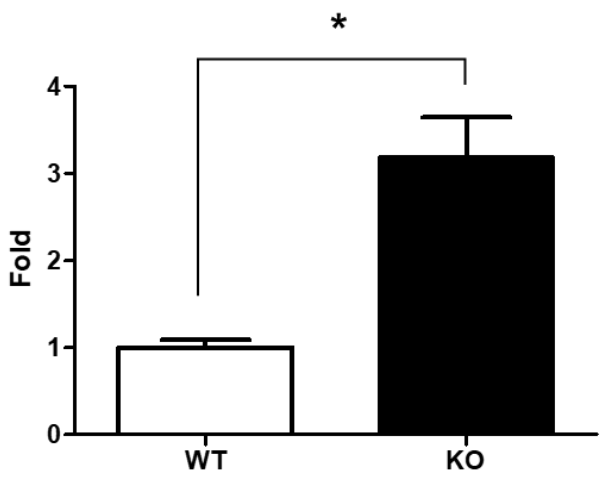

**miR-107**  
(suppressing angiogenesis)

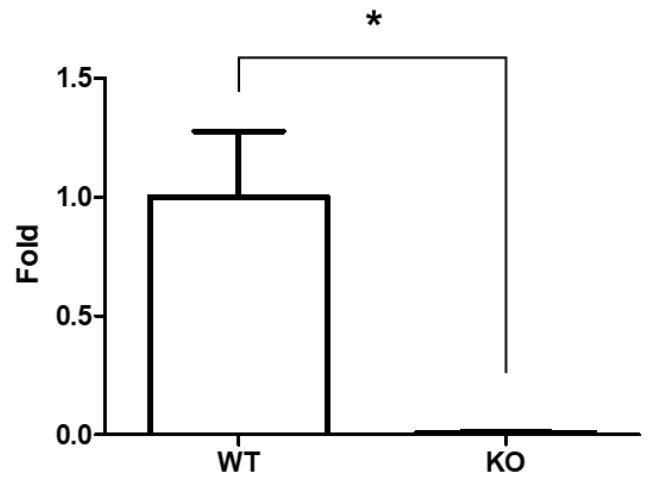

- primary WT mouse derived exosome
- primary kai1 KO mouse derived exosome

# Video 1

ECs +

---

Ad-Mock  
PCs

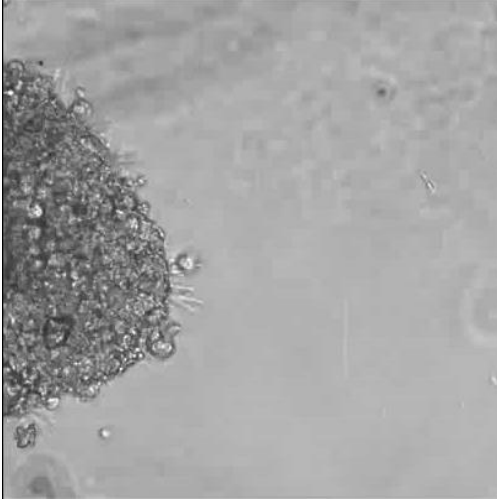

Ad-Kai1 O/E  
PCs

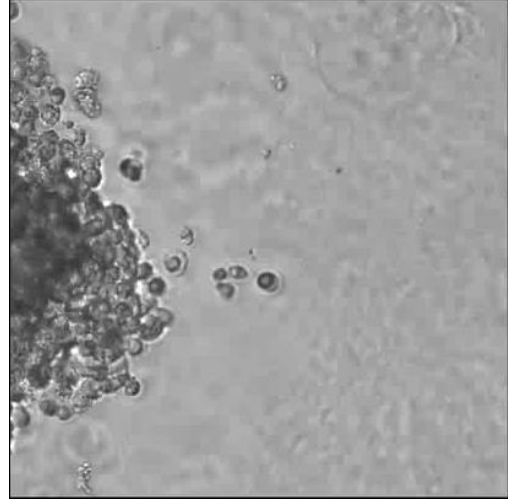

Supplement: MOESM1 [file 19669380]
